# Supplementary material
Source: ML conference proceedings conference paper supplement (https://proceedings.neurips.cc/paper_files/paper/2016/hash/f69e505b08403ad2298b9f262659929a-Abstract.html)
Supplement: Supplementary file [file f69e505b08403ad2298b9f262659929a-Supplemental.zip]

# Appendix

## A Implementation Details

### A.1 MI-LSTM

Our MI-LSTM (without peephole connection) in experiments has the follow formulation:

$$\begin{aligned}
 \mathbf{z}_t &= \tanh(\alpha_z \odot \mathbf{W}_z \mathbf{x}_t \odot \mathbf{U}_z \mathbf{h}_{t-1} + \beta_{z,1} \odot \mathbf{U}_z \mathbf{h}_{t-1} + \beta_{z,2} \odot \mathbf{W}_z \mathbf{x}_t + \mathbf{b}_z) & \text{block input} \\
 \mathbf{i}_t &= \sigma(\alpha_i \odot \mathbf{W}_i \mathbf{x}_t \odot \mathbf{U}_i \mathbf{h}_{t-1} + \beta_{i,1} \odot \mathbf{U}_i \mathbf{h}_{t-1} + \beta_{i,2} \odot \mathbf{W}_i \mathbf{x}_t + \mathbf{b}_i) & \text{input gate} \\
 \mathbf{f}_t &= \sigma(\alpha_f \odot \mathbf{W}_f \mathbf{x}_t \odot \mathbf{U}_f \mathbf{h}_{t-1} + \beta_{f,1} \odot \mathbf{U}_f \mathbf{h}_{t-1} + \beta_{f,2} \odot \mathbf{W}_f \mathbf{x}_t + \mathbf{b}_f) & \text{forget gate} \\
 \mathbf{c}_t &= \mathbf{i}_t \odot \mathbf{z}_t + \mathbf{f}_t \odot \mathbf{c}_{t-1} & \text{cell state} \\
 \mathbf{o}_t &= \sigma(\alpha_o \odot \mathbf{W}_o \mathbf{x}_t \odot \mathbf{U}_o \mathbf{h}_{t-1} + \beta_{o,1} \odot \mathbf{U}_o \mathbf{h}_{t-1} + \beta_{o,2} \odot \mathbf{W}_o \mathbf{x}_t + \mathbf{b}_o) & \text{output gate} \\
 \mathbf{h}_t &= \mathbf{o}_t \odot \tanh(\mathbf{c}_t) & \text{block output}
 \end{aligned}$$

where  $\{\alpha_*, \beta_{*,1}, \beta_{*,2}\}_{*=z,i,f,o}$  are bias vectors,  $\sigma$  denotes the sigmoid function.

### A.2 MI-GRU

Our MI-GRU in experiments has the follow formulation:

$$\begin{aligned}
 \mathbf{z}_t &= \sigma(\alpha_z \odot \mathbf{W}_z \mathbf{x}_t \odot \mathbf{U}_z \mathbf{h}_{t-1} + \beta_{z,1} \odot \mathbf{U}_z \mathbf{h}_{t-1} + \beta_{z,2} \odot \mathbf{W}_z \mathbf{x}_t + \mathbf{b}_z) & \text{update gate} \\
 \mathbf{r}_t &= \sigma(\alpha_r \odot \mathbf{W}_r \mathbf{x}_t \odot \mathbf{U}_r \mathbf{h}_{t-1} + \beta_{r,1} \odot \mathbf{U}_r \mathbf{h}_{t-1} + \beta_{r,2} \odot \mathbf{W}_r \mathbf{x}_t + \mathbf{b}_r) & \text{reset gate} \\
 \tilde{\mathbf{h}}_t &= \tanh(\alpha_h \odot \mathbf{W}_h \mathbf{x}_t \odot \mathbf{U}_h (\mathbf{r}_t \odot \mathbf{h}_{t-1}) + \beta_{h,1} \odot \mathbf{U}_h (\mathbf{r}_t \odot \mathbf{h}_{t-1}) + \beta_{h,2} \odot \mathbf{W}_h \mathbf{x}_t + \mathbf{b}_h) & \text{candidate activation} \\
 \mathbf{h}_t &= (1 - \odot \mathbf{z}_t) \odot \mathbf{h}_{t-1} + \mathbf{z}_t \odot \tilde{\mathbf{h}}_{t-1} & \text{hidden activation}
 \end{aligned}$$

where  $\{\alpha_*, \beta_{*,1}, \beta_{*,2}\}_{*=z,r,h}$  are bias vectors,  $\sigma$  denotes the sigmoid function.
